# Supplementary material for: Supramolecular assemblies of photochromic benzodithia-18-crown-6 ethers in crystals, solutions, and monolayersElectronic supplementary information (ESI) available: crystal data, data collection, and structure solution and refinement parameters. See http://www.rsc.org/suppdata/nj/b1/b110630a/
Source: Royal Society of Chemistry journal article supplement (doi:10.1039/b110630a), 2002-04-10
Supplement: b110630a.doc [file b110630a.doc]

Crystal data, data collection, structure solution and refinement parameters.

| Compound | **1a** | **1b** |
| --- | --- | --- |
| Empirical formula | C26 H32 I N O4 S3 | C26 H32 Cl N O8 S3 |
| Formula weight | 645.61 | 618.16 |
| Colour, habit | Red block | Yellow plate |
| Crystal size [mm] | 0.3  0.2  0.1 | 0.32 x 0.36 x 0.04 |
| Crystal system | Triclinic | Monoclinic |
| Space group | P-1 | P21/c |
| Unit cell dimensions:  *a* [Å]  *b* [Å]  *c* [Å]   [°]   [°]   [°] | 9.694(7)  12.296(3)  13.707(4)  64.05(2)  85.40(5)  71.31(2) | 23.828(4)  9.682(2)  12.337(2)  90.0  96.91(1)  90.0 |
| Volume [Å3] | 1388.2(11) | 2825.7(8) |
| Z | 2 | 4 |
| Density (calcd.) [g×cm-3] | 1.545 | 1.453 |
| Absorption coeff. [mm-1] | 1.411 | 0.407 |
| F(000) | 656 | 1296 |
| Diffractometer | Enraf-Nonius CAD4 | Siemens CCD SMART |
| Temperature [K] | 295 | 150.0(2) |
| Radiation  [Å] | graphite-monochromated Mo-K (0.71073) | graphite-monochromated Mo-K (0.71073) |
| Reflections collected | 6432 | 17114 |
| Independent reflections | 4884 [Rint = 0.0182] ] | 5250 [Rint = 0.1529] |
| Absorbtion correction | Empirical ( scan) | None |
| Min. / Max. transmission | 0.6791 and 0.9253 |  |
| Data/restraints/parameters | 4699 / 0 / 321 | 4392 / 0 / 364 |
| Goodness-of-fit on F2 | 1.022 | 1.089 |
| Final R indices [*I*>2(*I*)] | R1 = 0.0452, *w*R2 = 0.1221 | R1 = 0.0928, wR2 = 0.2181 |
| R indices (all data) | R1 = 0.0728, *w*R2 = 0.1379 | R1 = 0.1581, wR2 = 0.3337 |
| Extinction coefficient | 0.000(3) | 0.0007(6) |
| Largest diff. peak and hole [e×Å-3] | 1.582 / -1.161 | 1.623 and -0.647 |
